# Supplementary material
Source: publisher site journal article supplement (https://www.degruyterbrill.com/publication/journal_key/JBCPP/downloadAsset/JBCPP_Template%20for%20Review%20Articles.docx)
Supplement: Supplementary file 1 [file JBCPP_Template%20for%20Review%20Articles.docx]

Review

**Given name initial(s). surname, …, Corresponding author´s given name initial(s). surname*, Given name initial(s). surname**

***Corresponding author(s): Given name(s) initial(s) surname(s),** department, institution, city, country, Tel:, E-mail:

**Given name(s) initial(s) surname(s):** department, institution, city, country

**Given name(s) initial(s) surname(s):** department, institution, city, country

**Given name(s) initial(s) surname(s):** department, institution, city, country

Title in down-style

**DOI**: https://doi.org/xxxxx/xxxxxxxxxx

**Received**: Month Day, Year; **Accepted**: Month Day, Year

**Abstract**

Abstract text.

**Keywords**: keyword 1; keyword 2; keyword 3 (in alphabetical order, non-capitalized)

Introduction

Main text paragraph.

Heading 2nd order in down-style

Main text paragraph.

Heading 2nd order in down-style

Main text paragraph.

**Table 1.** Table title in down-style. **(Note: Please do not include the table in a textbox or frame)**

| Head 1 | Head 2 | Head 3 | Head 4 | Head 5 |
| --- | --- | --- | --- | --- |
| Value, unit | Column 2 a | Column 3 | Abb1 | Column 5 |
| Value, unit | Column 2 b | Column 3 | Column 4 c | Abb2 |

In the footnote, arefer to information within the Table with superscript lowercase letters; band do not use special characters or numbers; cseparate abbreviations by comma and semicolon. Abb1, Abbreviation1; Abb2, Abbreviation2.

Main text paragraph.

**(Insert figure here. Note: Please do not combine figure and legend in a textbox or frame.)**

**Figure 1:** Figure title text in down-style. Figure legend text. In multi-part figures (A), uppercase letters (B), are used to (C), identify different parts.

Main text paragraph.

**(Insert figure here. Note: Please do not combine figure and legend in a textbox or frame.)**

**Figure 2:** Figure title text in down-style Figure legend text. In multi-part figures (A), uppercase letters (B), are used to (C), identify different parts.

Main text paragraph.

Heading 3rd order in down-style

Main text paragraph.

Heading 2nd order in down-style

Main text paragraph.

**Table 2.** Table title in down-style. **(Note: Please do not include the table in a textbox or frame)**

| Head 1 | Head 2 | Head 3 | Head 4 | Head 5 |
| --- | --- | --- | --- | --- |
| Value, unit | Column 2 a | Column 3 | Abb3 | Column 5 |
| Value, unit | Column 2 b | Column 3 | Column 4 c | Abb4 |

In the footnote, arefer to information within the Table with superscript lowercase letters; band do not use special characters or numbers; cseparate abbreviations by comma and semicolon. Abb3, Abbreviation3; Abb4, Abbreviation4.

Summary and Outlook

Main text paragraph.

References (examples)

1. **(Article in journal)** Raustorp A, Mattsson E, Svensson K, Costa PT Jr. Physical activity, body composition and physical self-esteem: a 3-year follow-up study among adolescents in Sweden. Scand J Med Sci Sports 2006;16:258–66.
2. **(Article in journal with supplement)** Sallis JF, Saelens BE. Assessment of physical activity by self-report: status, limitations, and future directions. Res Q Exerc Sport 2000;71(2 Suppl):S1–14.
3. **(Article in journal, et.al. usage - more than 6 authors = 6 authors + et al.)** Kaye K, Day RD, Hair EC, Moore KA, Hadley AM, Teixeira PJ, et al. Parent marital quality and the parent-adolescent relationship: effects on sexual activity among adolescents and youth. Marriage Fam Rev 2009;45:270–88.
4. **(Articles in journal ahead of print)** Mason EB, Burkhart K, Lazebnik R. Adolescent stress management in a primary care clinic. J Pediatr Health Care 2018 Sep 3. DOI: 10.1016/j. pedhc.2018.08.001 [Epub ahead of print].
5. **(Article in journal – in press)** Tappy L, Lara KA. Metabolic effects of fructose and the worldwide increase in obesity. Physiol Rev, in press.
6. **(Article in online only journal)** Llano López LH, Melonari P, Olguin M, Fraile MD, Landa AI, Gargiulo AP. Effects of atenolol injected into the nucleus accumbens septi in rats in the elevated plus-maze test. J Basic Clin Physiol Pharmacol 2020;31. DOI: 10.1515/jbcpp-2020-0003.
7. **(Collaborations)** WHO. The diagnosis and management of non-alcoholic fatty liver disease: practice guideline by the American Association for the Study of Liver Diseases, American College of Gastroenterology, and the American Gastroenterological Association. Hepatology 2012;55:2005–23.
8. **(Book/monograph)** Shek DTL, Sun RCF, Merrick J. University and college students. Health and development issues for the leaders of tomorrow. New York: Nova Science; 2013.
9. **(Book with edition)** Joannopoulos JD, Johnson SG, Winn JN, Meade RD. Photonic crystals: molding the flow of light, 2nd ed. Princeton, NJ: Princeton University Press; 2008:350 p.
10. **(Edited book)** Shek DTL, Ma C, Yu L, Merrick J, editors. Human developmental research. Experience from research in Hong Kong. New York: Nova Science; 2014.
11. **(Edited book with chapter title and editors)** Halpen-Felsher BL, Morrell HE. Preventing and reducing tobacco use. In: Berlan ED, Bravender T, editors. Adolescent medicine today: a guide to caring for the adolescent patient [Internet]. Singapore: World Scientific Publishing Co.; 2012.
12. **(Edited book series)** Forghieri F, Tkach RW, Chraplyvy AR. Optical fiber telecommunications, Kaminov IP, Koch TL, editors. San Diego, CA: Academic; 1997, vol IIIA.
13. **(Proceedings/Conferences)** Musaka K, Akasaka Y, Suzuki Y, Kamiya T. Novel network fiber to manage dispersion at 1.55 μm with combination of 1.3 μm zero dispersion single mode fiber. In: Proceedings of the symposium on.
14. **(Websites)** Country & Technical Guidance - Coronavirus disease (COVID-19). Available at: https://www.who.int/emergencies/diseases/novel-coronavirus-2019/technical-guidance-publications. Accessed: 01 July 2020.
